# Supplementary material for: Bio-Inspired Graphene Oxide membranes for Efficient Separation of Heavy Metal Ions and Desalination of Water
Source: Research Square preprint supplement (doi:10.21203/rs.3.rs-1887732/v1), 2022-08-16
Supplement: Supplementary file 1 [file 66cdc415b3f77266ad95e8ee.docx]

**G R A P H I C A L A B S T R A C T**

______________________________________________________________________________

Bio-inspired graphene oxide-based (GO/OE and GO/Q) membranes were prepared by green method and used for selective separation of heavy metal ions and water desalination. The GO/OE membrane shows an excellent rejection efficiency ˃90% for several heavy metal ions such as Cr6+, As3+, Cd2+, Pb2+ and ˃70% rejection for NaCl, Na2SO2, MgCl2, and MgSO4. In addition, both membranes use for filtration of Indus River water and show remarkable high separation efficiency and making river water suitable for drinking purpose.


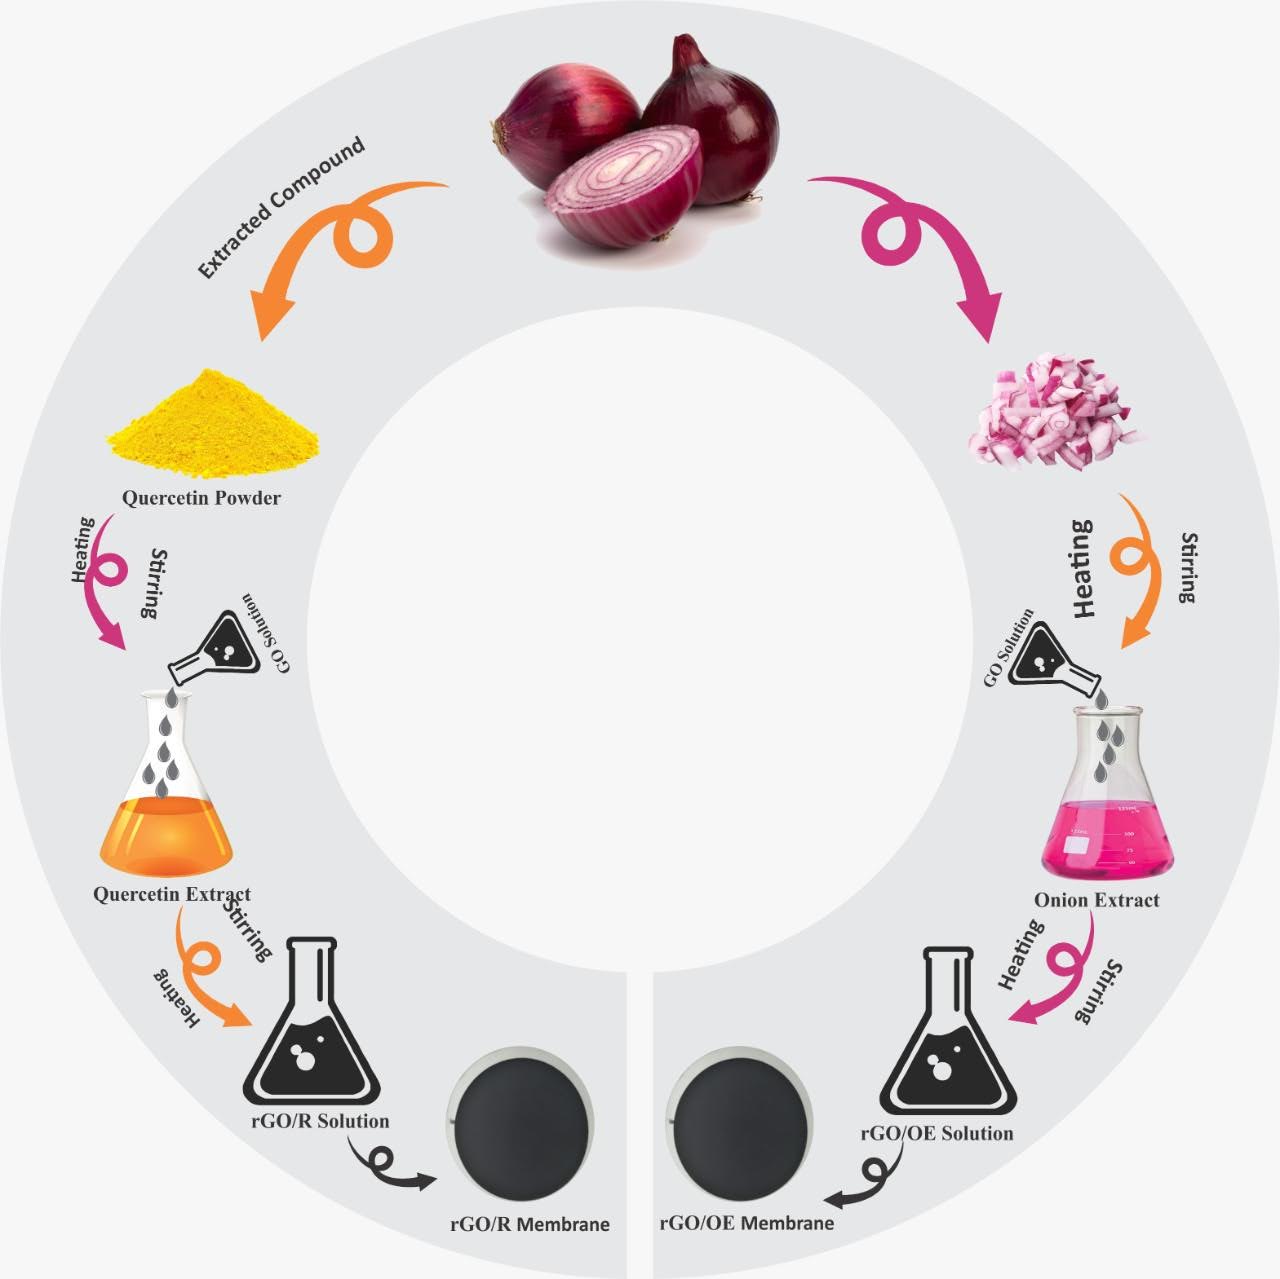


_____________________________________________________________________________
